# Supplementary material
Source: PubMed Central journal article supplement (PMC7430997)
Supplement: pnas.2006853117.sapp.pdf [file pnas.2006853117.sapp.pdf]

# PNAS

[www.pnas.org](http://www.pnas.org)

Supplementary Information for

COVID-19 lockdowns cause global air pollution declines

Zander S. VENTER; Kristin AUNAN; Sourangsu CHOWDHURY; Jos LELIEVELD

Zander S. Venter

Email: [zander.venter@nina.no](mailto:zander.venter@nina.no)

**This PDF file includes:**

Supplementary text  
Figures S1 to S5  
Tables S1

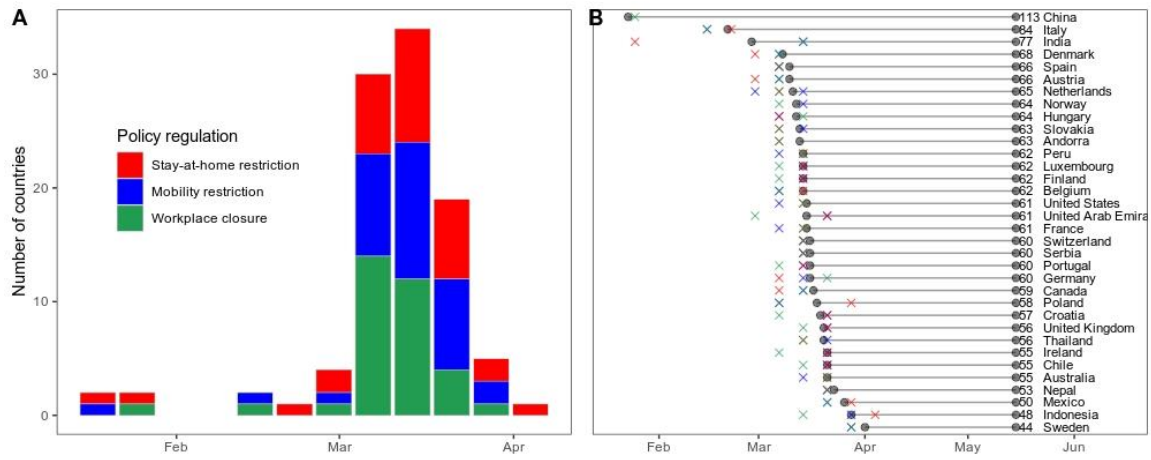

**Fig. S1. Lockdown policy restrictions.** The average date for the implementation of three types of policy restriction (A) were used to define country-specific lockdown start dates. Lockdown periods are indicated in B with horizontal lines up until 15 May 2020. Start dates of policy regulations are indicated with “x” in B.

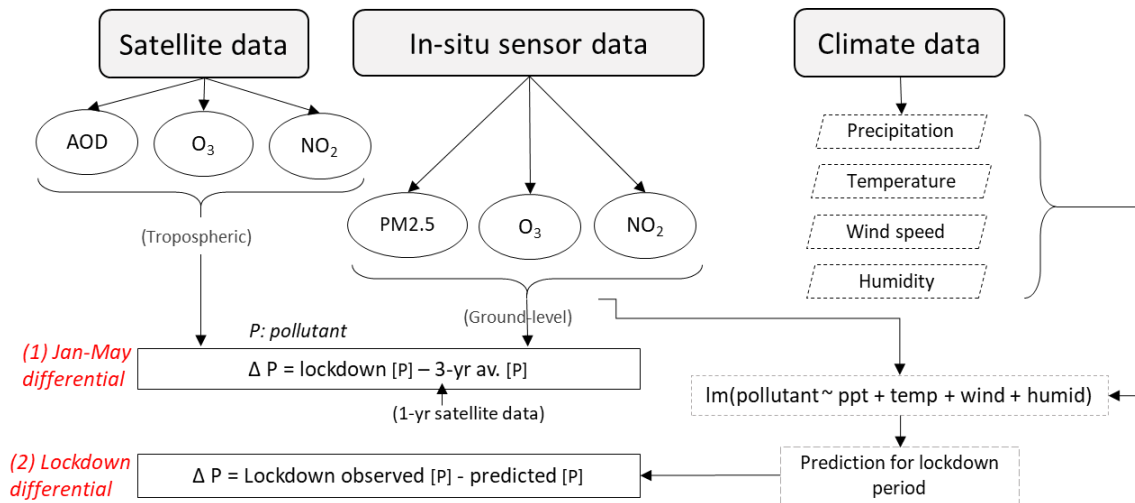

**Fig. S2. Methodological workflow.** Two types of air pollution ( $P$ ) anomaly are calculated including *Jan-May differential* and *Lockdown differential*. The first is the difference between the Jan-May 2020 average and the average for the same days during the previous three years (2017-2019; ground-station data) or one year (2019; satellite data). The *Lockdown differential* is the difference between observed and predicted pollutant levels for lockdown dates. Predictions account for the confounding effects of weather variability using a regression model.

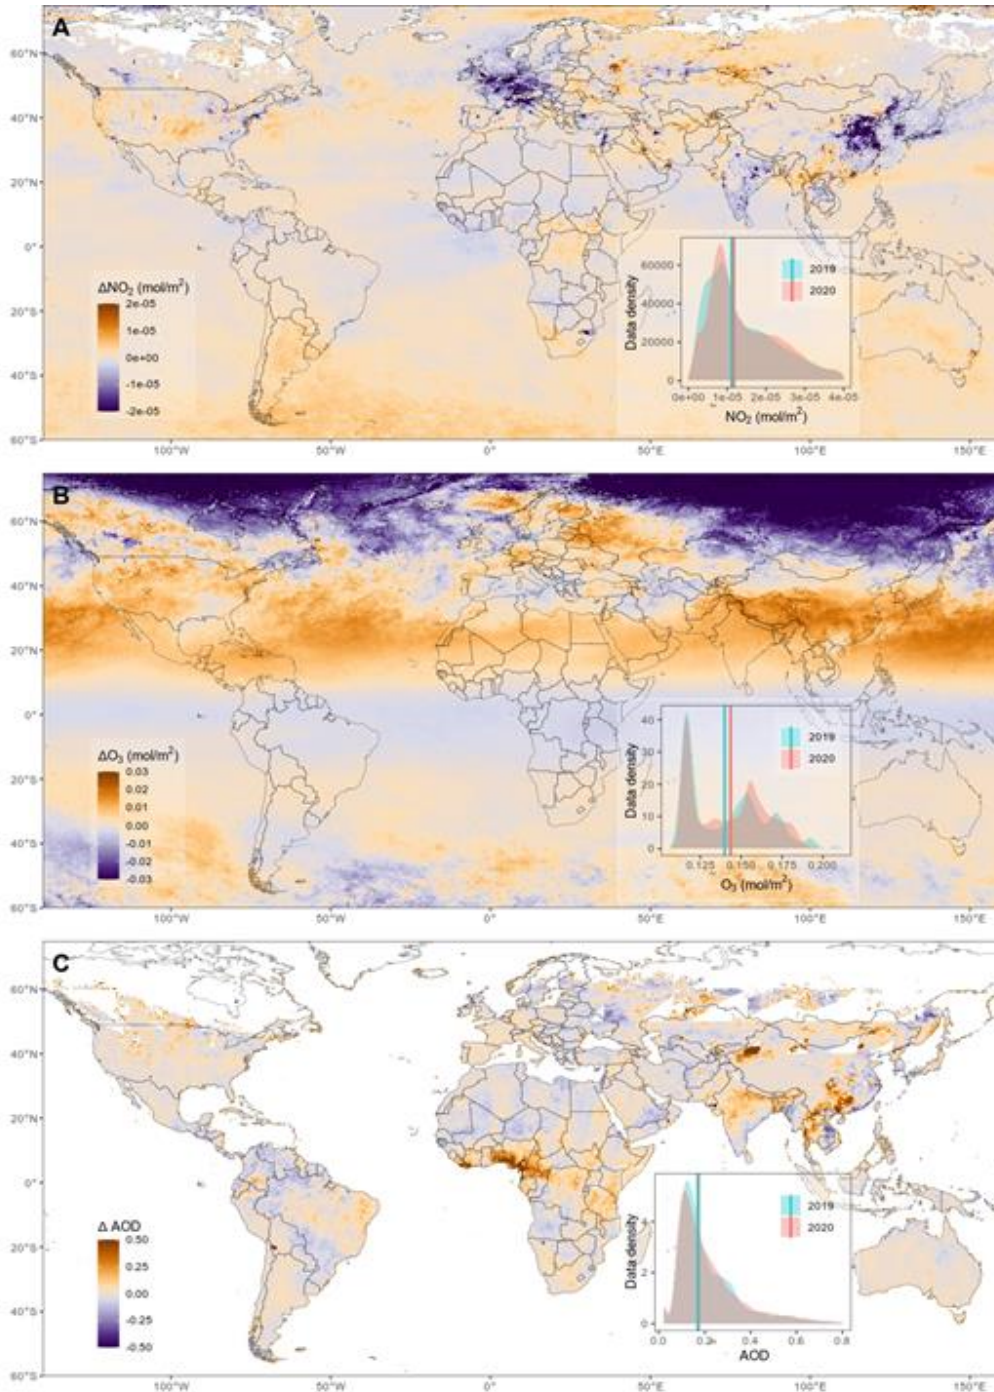

**Fig. S3. Global distribution of 2020 satellite air pollution anomalies.** Satellite measures of  $\text{NO}_2$  (A),  $\text{O}_3$  (B), and aerosol optical depth (AOD; C) anomalies are mapped. Anomalies are defined as deviations in 2020 Jan-May averages from 2019 levels for the same dates. Inset plots show data density distributions for 2019 and 2020 periods.

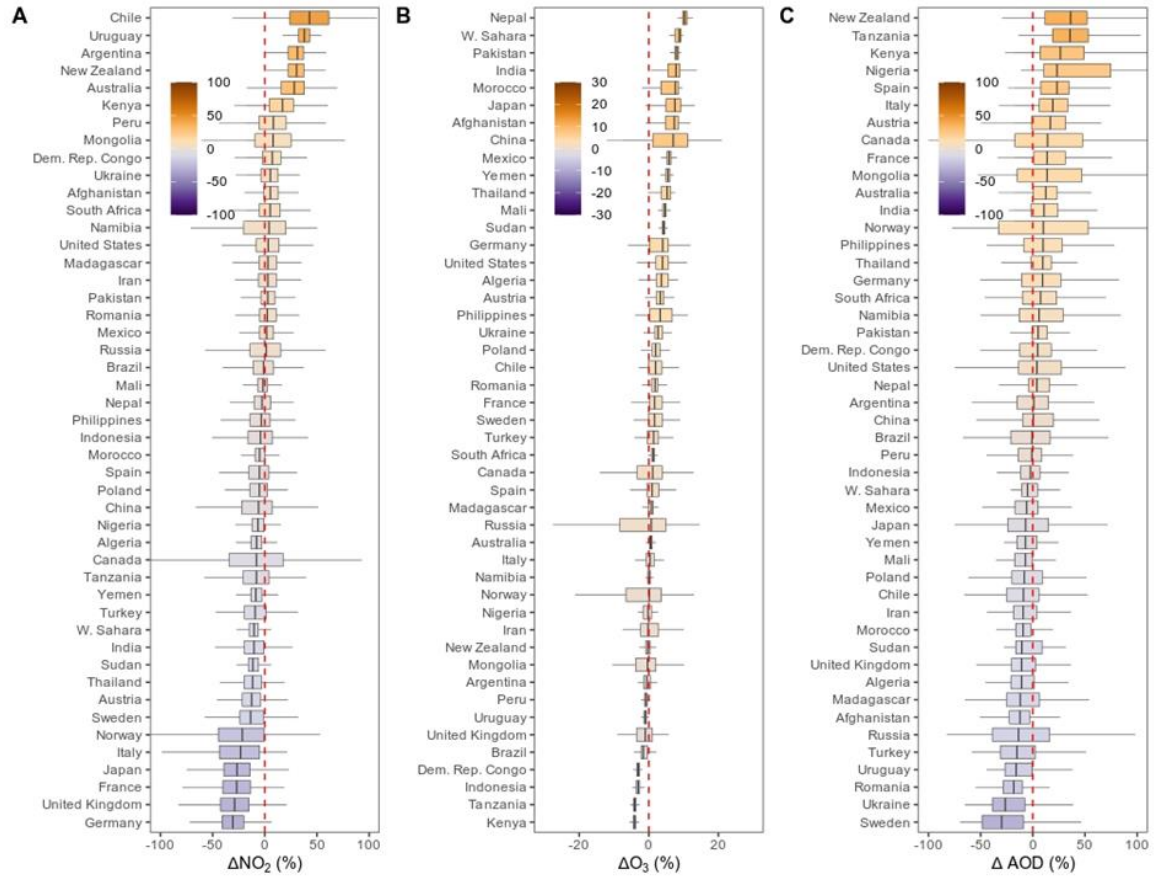

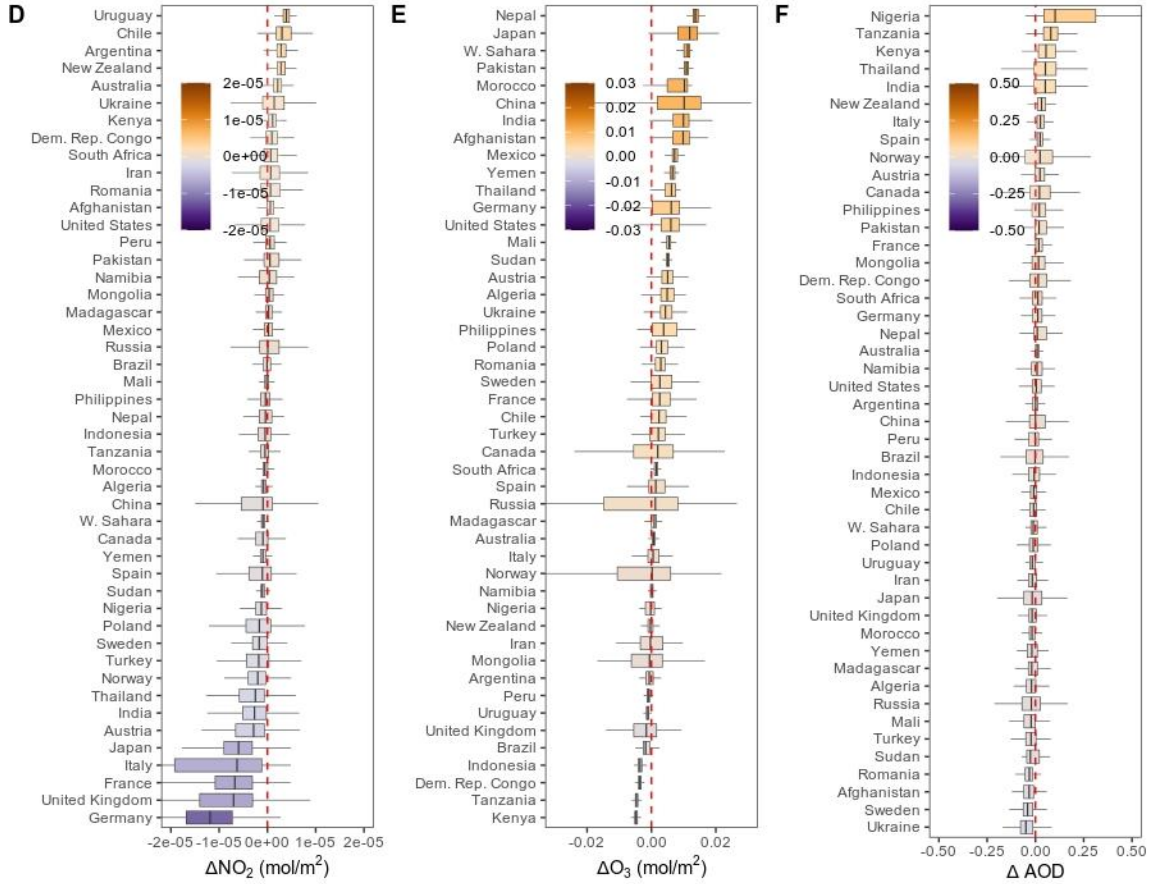

**Fig. S4. Satellite-derived atmospheric air pollution Jan-May anomalies.** Percentage (A, B, C) and absolute (D, E, F) temporal differentials (Jan-May 2020 vs Jan-May 2019) in atmospheric NO<sub>2</sub>, O<sub>3</sub> and aerosol optical depth (AOD) per country. Box and whisker plots show the spread of the data (each data point is a satellite pixel within a country) around the median value.

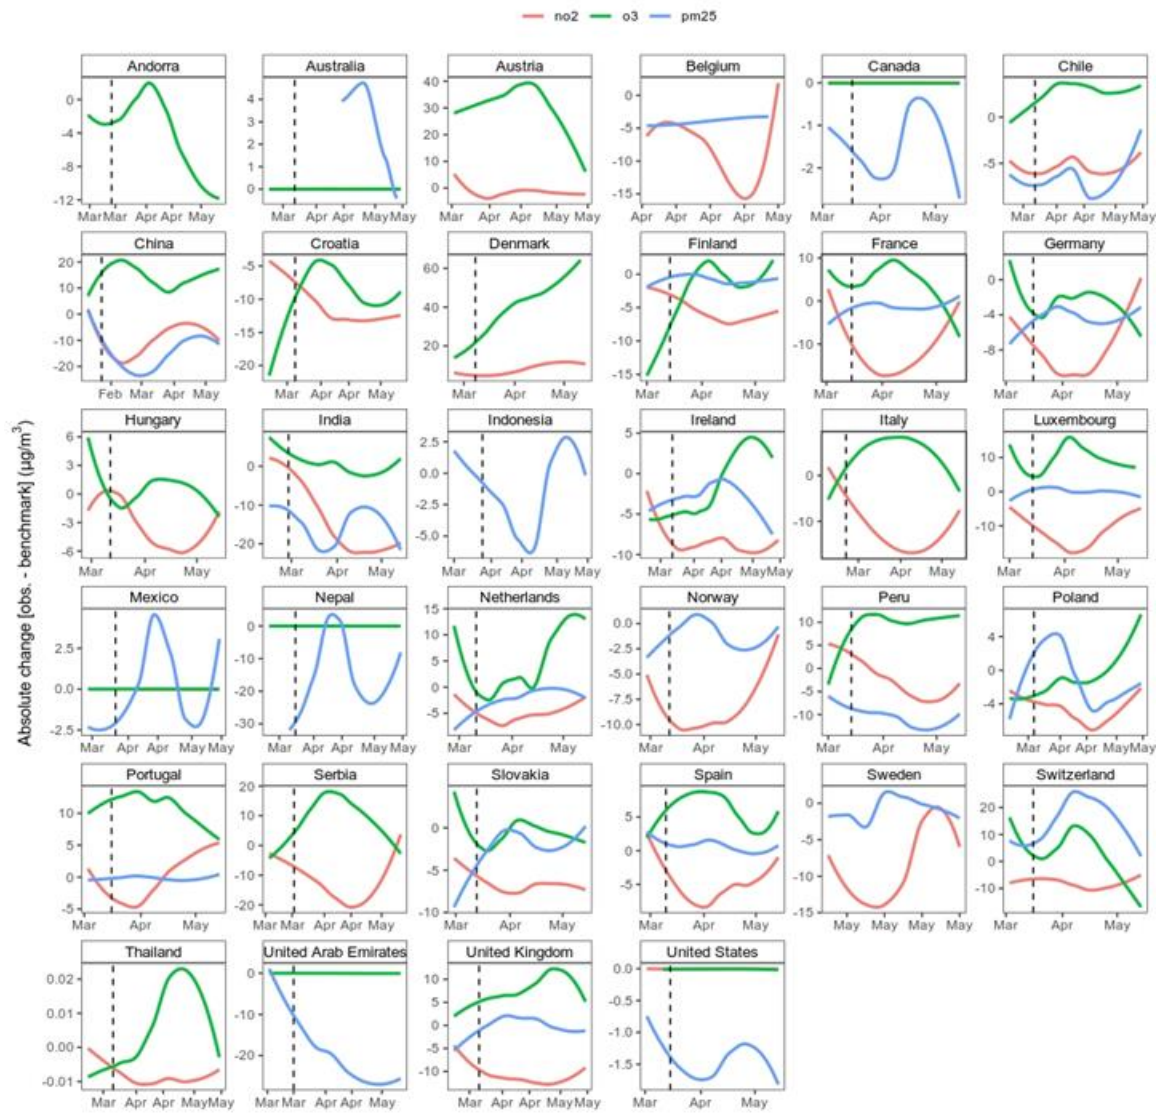

**Fig. S5. Ground-level pollutant time series and lockdown dates.** Daily time series of ground-level NO<sub>2</sub>, O<sub>3</sub> and PM<sub>2.5</sub> anomalies (observed subtract benchmark model predicted values) per country with dates of lockdown indicated by vertical lines. Smoothed loess regression lines are fitted to indicate moving averages. Lines for each pollutant are plotted on the same Y-axis and thus pollutants with very small temporal variation from the benchmark appear flat (e.g. O<sub>3</sub> for Australia). Please consult interactive web application for individual plots: <https://nina.earthengine.app/view/lockdown-pollution>

**Table S1. Regression model performance.** Air pollutant concentrations were regressed on daily 2017-2019 meteorological data (temperature, humidity, precipitation and wind speed) to predict what air pollutant concentrations were expected to be during lockdown dates. Separate models were built for each country and the resulting  $R^2$  and  $p$ -values are presented.  $R^2$  indicate the extent to which models were able to explain the temporal variance in air pollution and therefore how accurate their predictions over the lockdown period are expected to be.

| Country   | NO <sub>2</sub> |         | O <sub>3</sub> |         | PM <sub>2.5</sub> |         |
|-----------|-----------------|---------|----------------|---------|-------------------|---------|
|           | R <sup>2</sup>  | p-value | R <sup>2</sup> | p-value | R <sup>2</sup>    | p-value |
| Andorra   | -               | -       | 0.685          | 3.E-167 | -                 | -       |
| Australia | 0.267           | 5.E-55  | 0.414          | 6.E-102 | 0.178             | 2.E-20  |
| Austria   | 0.467           | 2.E-04  | 0.506          | 3.E-06  | -                 | -       |
| Belgium   | 0.454           | 1.E-56  | 0.554          | 1.E-33  | 0.261             | 8.E-23  |
| Canada    | 0.289           | 1.E-51  | 0.572          | 2.E-158 | 0.135             | 5.E-21  |
| Chile     | 0.476           | 1.E-120 | 0.216          | 1.E-40  | 0.740             | 1.E-266 |
| China     | 0.619           | 7.E-139 | 0.510          | 2.E-102 | 0.542             | 1.E-112 |
| Croatia   | 0.444           | 5.E-96  | 0.647          | 7.E-163 | -                 | -       |
| Denmark   | 0.551           | 2.E-103 | 0.470          | 2.E-76  | -                 | -       |
| Finland   | 0.413           | 2.E-92  | 0.576          | 9.E-154 | 0.256             | 2.E-48  |
| France    | 0.560           | 9.E-147 | 0.763          | 1.E-267 | 0.341             | 7.E-71  |
| Germany   | 0.393           | 4.E-82  | 0.553          | 9.E-141 | 0.313             | 7.E-62  |
| Hungary   | 0.478           | 2.E-111 | 0.693          | 5.E-210 | -                 | -       |



| Country     | NO <sub>2</sub> |         | O <sub>3</sub> |         | PM <sub>2.5</sub> |         |
|-------------|-----------------|---------|----------------|---------|-------------------|---------|
|             | R <sup>2</sup>  | p-value | R <sup>2</sup> | p-value | R <sup>2</sup>    | p-value |
| India       | 0.475           | 1.E-80  | 0.350          | 5.E-53  | 0.618             | 4.E-129 |
| Indonesia   | -               | -       | -              | -       | 0.157             | 2.E-21  |
| Ireland     | 0.462           | 1.E-87  | 0.742          | 9.E-104 | 0.340             | 2.E-13  |
| Italy       | 0.738           | 9.E-211 | 0.815          | 5.E-283 | -                 | -       |
| Luxembourg  | 0.580           | 8.E-140 | 0.708          | 7.E-195 | 0.328             | 6.E-59  |
| Mexico      | 0.510           | 1.E-68  | 0.409          | 1.E-89  | 0.254             | 5.E-47  |
| Nepal       | -               | -       | 0.690          | 2.E-151 | 0.599             | 6.E-116 |
| Netherlands | 0.442           | 3.E-91  | 0.266          | 2.E-33  | 0.316             | 1.E-55  |
| Norway      | 0.662           | 6.E-213 | -              | -       | 0.376             | 8.E-89  |
| Peru        | 0.540           | 1.E-52  | 0.395          | 3.E-33  | 0.155             | 3.E-06  |
| Poland      | 0.529           | 6.E-65  | 0.752          | 3.E-131 | 0.535             | 3.E-68  |
| Portugal    | 0.670           | 7.E-171 | 0.480          | 5.E-98  | 0.283             | 1.E-45  |
| Serbia      | 0.600           | 2.E-54  | 0.769          | 7.E-94  | -                 | -       |
| Slovakia    | 0.544           | 9.E-124 | 0.782          | 2.E-252 | 0.389             | 2.E-74  |
| Spain       | 0.515           | 1.E-73  | 0.658          | 4.E-109 | 0.443             | 1.E-46  |
| Sweden      | 0.373           | 8.E-34  | -              | -       | 0.200             | 2.E-07  |

| Country              | NO <sub>2</sub> |          | O <sub>3</sub> |          | PM <sub>2.5</sub> |          |
|----------------------|-----------------|----------|----------------|----------|-------------------|----------|
|                      | R <sup>2</sup>  | p-value  | R <sup>2</sup> | p-value  | R <sup>2</sup>    | p-value  |
| Switzerland          | 0.595           | 4.E-125  | 0.766          | 4.E-211  | 0.290             | 4.E-41   |
| Thailand             | 0.598054        | 1.8E-174 | 0.533168       | 2.6E-146 | -                 | -        |
| United Arab Emirates | -               | -        | 0.751776       | 1.73E-26 | 0.568429          | 1.61E-12 |
| United Kingdom       | 0.689013        | 2.2E-232 | 0.643462       | 9.3E-207 | 0.242885          | 4.21E-49 |
| United States        | 0.613242        | 3.2E-172 | 0.689224       | 3.5E-102 | 0.168472          | 2.01E-28 |
